# Supplementary material for: Effects of Long-Term (7 Years) Adoption of Conservation Agriculture and Nutrient Management Practices on the Soil Properties, System Crop and Water Productivity and Farm Economics of a Maize–Chickpea Rotation&nbsp;
Source: Research Square preprint supplement (doi:10.21203/rs.3.rs-134630/v1), 2020-12-31
Supplement: Supplementary file 1 [file 31048d39ae029aa6af7e0d6e.docx]

**Effects of long-term (7 years) adoption of conservation agriculture and nutrient management practices on the soil properties, system crop and water productivity and farm economics of a maize–chickpea rotation**

Vijay Pooniya1*, R.R. Zhiipao1, Niraj Biswakarma1, S.L. Jat2,Dinesh Kumar1, C.M.Parihar1, K. Swarnalakshmi1, Achal Lama3, A.K. Verma1, Debasish Roy1, Kajal Das4, K. Majumdar5, T. Satyanarayana6, R.D. Jat7, P.C. Ghasal8, Hardev Ram9, Rajkumar Jat10, Amlan Nath1

Supplementary table 1.Six years monthly variations in max. (a) & min. (b) temperatures, and rainfall pattern (c) and relative humidity (d) during experimentation. ***Source:*** *Agromet. Observatory, Division of Agricultural Physics, IARI, New Delhi.*

(a)

| Month/Year | July | Aug. | Sep. | Oct. | Nov. | Dec. | Jan. | Feb. | Mar. | Apr. |
| --- | --- | --- | --- | --- | --- | --- | --- | --- | --- | --- |
| 2013–14 | 34.8 | 32.8 | 34.5 | 31.5 | 26.9 | 22.4 | 18.6 | 21.0 | 26.9 | 34.8 |
| 2014–15 | 35.9 | 35.8 | 34.1 | 33.2 | 28.3 | 20.6 | 16.9 | 24.6 | 27.2 | 33.9 |
| 2015–16 | 33.8 | 33.5 | 35.2 | 33.8 | 28.1 | 22.6 | 20.7 | 24.6 | 30.8 | 38.7 |
| 2016–17 | 33.8 | 32.6 | 34.3 | 33.9 | 29.0 | 23.3 | 20.1 | 23.9 | 29.8 | 38.0 |
| 2017–18 | 34.1 | 33.6 | 33.6 | 34.0 | 26.8 | 23.0 | 20.6 | 24.9 | 31.6 | 36.5 |
| 2018–19 | 35.7 | 33.6 | 34.0 | 30.2 | 27.4 | 19.4 | 20.0 | 21.1 | 27.0 | 37.2 |
| 2019–20 | 41.3 | 38.2 | 34.0 | 35.1 | 32.0 | 27.0 | 15.2 | 20.0 | 21.0 | 35.5 |

(b)

| Month/Year | July | Aug. | Sep. | Oct. | Nov. | Dec. | Jan. | Feb. | Mar. | Apr. |
| --- | --- | --- | --- | --- | --- | --- | --- | --- | --- | --- |
| 2013–14 | 25.7 | 25.1 | 24.0 | 19.2 | 9.9 | 7.1 | 6.8 | 7.5 | 12.7 | 17.9 |
| 2014–15 | 26.3 | 25.8 | 24.0 | 18.8 | 10.6 | 6.7 | 6.8 | 10.6 | 13.1 | 19.2 |
| 2015–16 | 25.7 | 25.5 | 23.6 | 17.5 | 11.9 | 6.1 | 6.5 | 8.1 | 13.7 | 19.1 |
| 2016–17 | 24.4 | 24.2 | 22.5 | 16.2 | 9.0 | 5.3 | 7.7 | 9.9 | 14.2 | 20.7 |
| 2017–18 | 26.2 | 25.9 | 23.7 | 17.2 | 10.6 | 6.8 | 4.3 | 8.4 | 13.4 | 19.9 |
| 2018–19 | 27.5 | 26.5 | 25.5 | 14.8 | 13.8 | 7.5 | 6.4 | 9.6 | 12.4 | 21.1 |
| 2019–20 | 29.0 | 28.2 | 26.1 | 24.0 | 18.5 | 14.0 | 6.0 | 6.0 | 8.0 | 20.2 |

©

| Month/Year | July | Aug. | Sep. | Oct. | Nov. | Dec. | Jan. | Feb. | Mar. | Apr. |
| --- | --- | --- | --- | --- | --- | --- | --- | --- | --- | --- |
| 2013–14 | 459.8 | 521.9 | 108.1 | 109.0 | 0.4 | 6.8 | 18.6 | 63.5 | 63.5 | 16.4 |
| 2014–15 | 227.8 | 98.9 | 124.3 | 0.0 | 0.0 | 26.4 | 35.8 | 0.0 | 201.8 | 51.8 |
| 2015–16 | 377.8 | 261.3 | 67.2 | 0.0 | 2.2 | 0.0 | 0.0 | 1.4 | 17.8 | 0.6 |
| 2016–17 | 540.9 | 388.2 | 173.4 | 37.8 | 0.0 | 0.0 | 64.8 | 0.0 | 17.1 | 8.0 |
| 2017–18 | 170.2 | 202.0 | 193.0 | 0.0 | 0.0 | 7.4 | 6.0 | 0.0 | 0.0 | 26.0 |
| 2018–19 | 368.4 | 247.7 | 237.9 | 0.0 | 4.0 | 0.0 | 52.0 | 70.8 | 10.2 | 5.7 |
| 2019–20 | 283.9 | 277.0 | 17.4 | 41.0 | 7.4 | 66.0 | 47.7 | 2.0 | 174.6 | 8.8 |

(d)

| Month/Year | July | Aug. | Sep. | Oct. | Nov. | Dec. | Jan. | Feb. | Mar. | Apr. |
| --- | --- | --- | --- | --- | --- | --- | --- | --- | --- | --- |
| 2013–14 | 81.0 | 89.0 | 75.0 | 75.0 | 70.0 | 75.0 | 82.0 | 80.0 | 69.0 | 57.0 |
| 2014–15 | 75.0 | 72.0 | 71.0 | 62.0 | 61.0 | 76.0 | 83.0 | 70.0 | 71.0 | 60.0 |
| 2015–16 | 76.0 | 78.0 | 63.0 | 64.0 | 69.0 | 72.0 | 78.0 | 71.0 | 71.0 | 56.0 |
| 2016–17 | 82.0 | 82.0 | 72.0 | 63.0 | 63.0 | 72.0 | 76.4 | 70.0 | 62.0 | 55.7 |
| 2017–18 | 78.2 | 82.4 | 76.8 | 67.8 | 69.4 | 68.9 | 71.7 | 66.3 | 57.5 | 45.1 |
| 2018–19 | 83.3 | 89.0 | 87.3 | 89.0 | 88.6 | 86.7 | 90.3 | 94.7 | 89.3 | 71.8 |
| 2019–20 | 65.0 | 84.0 | 90.2 | 86.0 | 87.0 | 87.0 | 67.2 | 93.5 | 98.0 | 65.5 |
